# Supplementary material for: Direct comparison of whole heart quantifications between different retrospective and prospective gated 4D flow CMR acquisitions
Source: PubMed Central journal article supplement (PMC11322094; doi:10.3389/fcvm.2024.1411752), 2024-07-31
Supplement: Datasheet1.pdf [file Datasheet1.pdf]

## **SUPPLEMENTARY MATERIAL**

### **Direct comparison of whole heart quantifications between different retrospective and prospective gated 4D flow CMR acquisitions**

#### **TABLE OF CONTENTS**

|                                                                                  |   |
|----------------------------------------------------------------------------------|---|
| SUPPLEMENTARY RESULTS: TIMING OF SYSTOLIC AND DIASTOLIC TRANSVALVULAR FLOW ..... | 2 |
| SUPPLEMENTARY TABLE 1: PARTICIPANT CHARACTERISTICS .....                         | 3 |

### **Supplementary Results: Timing of Systolic and Diastolic Transvalvular Flow**

Flow through the aortic valve started at the beginning of the cycle and ended at  $37\pm 5\%$  into the cardiac cycle ( $353\pm 33\text{ms}$ ). Blood flow through the mitral valve started shortly thereafter, with early (E) diastolic flow lasting from  $38\pm 4\%$  ( $368\pm 46\text{ms}$ ) to  $68\pm 6\%$  ( $666\pm 88\text{ms}$ ) of the cardiac cycle. Typically, after a period of diastasis the late diastolic flow (A) occurred between  $82\pm 7$  ( $811\pm 187\text{ms}$ ) and  $96\pm 6\%$  ( $934\pm 187\text{ms}$ ) of the cardiac cycle.

For the right heart, similar timepoints were observed with blood flow through the pulmonary valve lasting from the start of the cycle until  $38\pm 5\%$  ( $364\pm 30\text{ms}$ ), early diastolic flow through the tricuspid valve occurring between  $38\pm 5\%$  ( $362\pm 40$ ) and  $70\pm 9\%$  ( $678\pm 103\text{ms}$ ), and late diastolic flow between  $81\pm 8\%$  ( $804\pm 196\text{ms}$ ) and  $95\pm 5\%$  ( $926\pm 191\text{ms}$ ).

**Supplementary Table 1: Participant Characteristics**

|                                       | <b>Controls<br/>(n=32)</b> | <b>Patients<br/>(n=6)</b> |
|---------------------------------------|----------------------------|---------------------------|
| <i>Baseline</i>                       |                            |                           |
| Sex (males)                           | 17 (53%)                   | 4 (66%)                   |
| Age, range (years)                    | 27 [19-41]                 | 70 [60-78]                |
| Body Mass Index (kg/m <sup>2</sup> )  | 23.1±2.9                   | 27.0±3.5                  |
| <i>Left Ventricular Function</i>      |                            |                           |
| EDV (ml)                              | 167±30                     | 167±33                    |
| EDV index (ml/kg <sup>2</sup> )       | 89±10                      | 86±12                     |
| Ejection Fraction (%)                 | 59±5                       | 57±11                     |
| Mass index (g/kg <sup>2</sup> )       | 53±9                       | 52±7                      |
| Cardiac index (L/min/m <sup>2</sup> ) | 3.3±0.7                    | 3.3±0.7                   |
| <i>Right Ventricular Function</i>     |                            |                           |
| EDV (ml)                              | 197±42                     | 177±44                    |
| EDV index (ml/kg <sup>2</sup> )       | 101±15                     | 90±19                     |
| Ejection Fraction (%)                 | 44±6                       | 47±9                      |

Frequency (percentage) or mean±SD are displayed of patient characteristics and functional analysis measured from standard cines. Full short-axis stacks of the right heart were only available in n=20 healthy controls. EDV: End-diastolic volume.
